# Supplementary material for: A universal pocket in fatty acyl-AMP ligases ensures redirection of fatty acid pool away from coenzyme A-based activation
Source: eLife. 2021 Sep 7;10:e70067. doi: 10.7554/eLife.70067 (PMC8460268; doi:10.7554/eLife.70067)
Supplement: Figure 2—source data 2. — These values were obtained from densitometric quantification of the TLC images, which were used to plot Figure 2c. [file elife-70067-fig2-data2.xlsx]

## Sheet: RawData
		Wt	Wt	F275A	F275A	M227A	M227A	A253G	A253G	∆DFAM	∆DFAM	F275A & M227A	F275A & M227A	F275A & A253G	F275A & A253G	F275A & A253G& M227A	F275A & A253G& M227A	Control	Control
	EcFAAL	Acyl-AMP	Acyl-CoA	Acyl-AMP	Acyl-CoA	Acyl-AMP	Acyl-CoA	Acyl-AMP	Acyl-CoA	Acyl-AMP	Acyl-CoA	Acyl-AMP	Acyl-CoA	Acyl-AMP	Acyl-CoA	Acyl-AMP	Acyl-CoA	Acyl-AMP	Acyl-CoA
		14.5	0.4	9.7	0.4	4.8	0.2	6.2	0.2	0.9	0.1	0.5	0.6	3.3	0.2	3.4	0.2	0.2	0.3
		12.6	0.1	10.3	1	0.2	0.2	6.7	0.4	0.3	0	0.3	0.2	3.7	0.4	4.2	0.7	0.4	0.4
		22.4	0.2	21.8	0.7	0.3	0.3	7.2	0.9	0.5	0.1	0.6	0.9	8.8	0.5	6.8	0.8	0.4	0.2
		16.4	0.1	20.9	0.8	0.1	0.3	2.6	0.1			0.1	0	2.1	0.1	5	0.1	0.2	0.2
		17.4	0.1	19.5	0.9	0.7	0.3	7.9	0.1			0.6	0	10.7	0.1	5.7	0.3	0.2	0.3
	Ave	16.66	0.18	16.44	0.76	1.22	0.26	6.12	0.34	0.566667	0.0666667	0.42	0.34	5.72	0.26	5.02	0.42	0.28	0.28
	SEM	1.65396	0.0583095	2.65624	0.102956	0.900777	0.0244949	0.923797	0.150333	0.176383	0.0333333	0.0969536	0.177764	1.69304	0.0812404	0.588558	0.139284	0.0489898	0.0374166
	MsFAAL 32	WT	WT	F284A	F284A	M233A	M233A	V257A	V257A	∆AVFR	∆AVFR	F284A & M233A	F284A & M233A	F284A & V257A	F284A & V257A	F284A & V257A& M233A	F284A & V257A& M233A	Control	Control
		Acyl-AMP	Acyl-CoA	Acyl-AMP	Acyl-CoA	Acyl-AMP	Acyl-CoA	Acyl-AMP	Acyl-CoA	Acyl-AMP	Acyl-CoA	Acyl-AMP	Acyl-CoA	Acyl-AMP	Acyl-CoA	Acyl-AMP	Acyl-CoA	Acyl-AMP	Acyl-CoA
		13.4	0.5	17.3	0.3	12.1	0.2	13.9	0.2	0.4	1.6	15.9	0.3	17.5	0.2	11.3	1.3	0.2	0.2
		14.7	0.6	17.9	0.3	12.1	0.3	13.9	0.3	0.5	1.8	16.1	1.3	17.5	0.5	10	1.1	0.2	0.2
		13.5	0.1	18.4	0.5	11	0.5	19.9	1.2	0.4	3.2	17	0.3	16.5	2.7	5.9	2.5	0.3	0.4
		16.4	0.1	17.5	0.4	15.4	0	10	0.1	0.1	1.2	12	0.1	19.4	0.1	9	0.4	0.2	0.3
		15.3	0.1	16.9	0.2	16.7	0.2	11.2	0.1	0.3	1.5	13.5	0.2	15.5	0.3	11	0.2	0.4	0.2
	Ave	14.66	0.28	17.6	0.34	13.46	0.24	13.78	0.38	0.34	1.86	14.9	0.44	17.28	0.76	9.44	1.1	0.26	0.26
	SEM	0.564447	0.111355	0.256905	0.0509902	1.09572	0.0812404	1.70921	0.208327	0.0678233	0.348712	0.927901	0.218174	0.646838	0.48949	0.972934	0.406202	0.04	0.04
	RsFAAL	Wt	Wt	F264	F264	M216A	M216A	∆LFIQ		F264A&M216A		F264A & I247G		F264A&M216A & I247G		Control
		Acyl-AMP	Acyl-CoA	Acyl-AMP	Acyl-CoA	Acyl-AMP	Acyl-CoA	Acyl-AMP	Acyl-CoA	Acyl-AMP	Acyl-CoA	Acyl-AMP	Acyl-CoA	Acyl-AMP	Acyl-CoA	Acyl-AMP	Acyl-CoA
		34.5	0.2	22.5	0.4	22.3	0.4	0.1	0.3	0.1	11.4	46.9	0.3	0.1	1.2	0.2	0.2
		32.5	0	15.9	1.9	27.2	0.9	0	0	0.2	4.6	73.8	0.5	0.2	1.1	0.2	0.2
		31.8	0	15.4	1.9	27.6	1.1	0.1	0	0.3	5	73.3	0.5	0.1	1	0.1	0.2
		30.1	0.1	10.9	0.9	16.5	1	0	0	0.1	7.1	59.4	1.2	0	0.6	0	0
		23.8	0	13.3	0.7	21.6	1.4	0	0	0.1	5.7	65.5	0.5	0	0.4	0.1	0
	Average	30.54	0.06	15.6	1.16	23.04	0.96	0.04	0.06	0.16	6.76	63.78	0.6	0.08	0.86	0.12	0.12
	SEM	1.82664	0.04	1.93804	0.31241	2.04318	0.163095	0.0244949	0.06	0.04	1.23556	4.99053	0.154919	0.0374166	0.153623	0.0374166	0.0489898

## Sheet: Percentage_Conversion
EcFAAL			Wt	F275A	M227A	∆DFAM	F275A & M227A	F275A & A253G& M227A	A253G	F275A & A253G
	Avg	Acyl-AMP	16.66	16.44	1.22	0.566667	0.42	5.02	6.12	5.72
		Acyl-CoA	0.18	0.76	0.26	0.0666667	0.34	0.42	0.34	0.26
	SEM	Acyl-AMP	1.65396	2.65624	0.900777	0.176383	0.0969536	0.588558	0.923797	1.69304
		Acyl-CoA	0.0583095	0.102956	0.0244949	0.0333333	0.177764	0.139284	0.150333	0.0812404
		%TA to A	0.989311	0.955814	0.824324	0.894737	0.552632	0.922794	0.947368	0.956522
		%TA to T	0.0106888	0.044186	0.175676	0.105263	0.447368	0.0772059	0.0526316	0.0434783
		E%TA to A	0.00367789	0.00883971	0.118238	0.0522462	0.145318	0.0251933	0.0232548	0.0179152
		E%TA to T	0.00367789	0.00883971	0.118238	0.0522462	0.145318	0.0251933	0.0232548	0.0179152
MsFAAL32			WT	F284A	M233A	∆AVFR	F284A & M233A	F284A & V257A& M233A	V257A	F284A & V257A
	Avg	Acyl-AMP	14.66	17.6	13.46	0.34	14.9	9.44	13.78	17.28
		Acyl-CoA	0.28	0.34	0.24	1.86	0.44	1.1	0.38	0.76
	SEM	Acyl-AMP	0.564447	0.256905	1.09572	0.0678233	0.927901	0.972934	1.70921	0.646838
		Acyl-CoA	0.111355	0.0509902	0.0812404	0.348712	0.218174	0.406202	0.208327	0.48949
		%TA to A	0.981258	0.981048	0.982482	0.154545	0.971317	0.895636	0.973164	0.957871
		%TA to T	0.0187416	0.0189521	0.0175182	0.845455	0.0286832	0.104364	0.0268362	0.0421286
		E%TA to A	0.00725899	0.00274802	0.00590762	0.0365548	0.0140393	0.0361575	0.0147953	0.0260666
		E%TA to T	0.00725899	0.00274802	0.00590762	0.0365548	0.0140393	0.0361575	0.0147953	0.0260666
RsFAAL			Wt	F264	M216A	∆LFIQ	F264A&M216A	F264A&M216A & I247G		F264A & I247G
	Avg	Acyl-AMP	30.54	15.6	23.04	0.04	0.16	0.08		63.78
		Acyl-CoA	0.06	1.16	0.96	0.06	6.76	0.86		0.6
	SEM	Acyl-AMP	1.82664	1.93804	2.04318	0.0244949	0.04	0.0374166		4.99053
		Acyl-CoA	0.04	0.31241	0.163095	0.06	1.23556	0.153623		0.154919
		%TA to A	0.998039	0.930788	0.96	0.4	0.0231214	0.0851064		0.99068
		%TA to T	0.00196078	0.0692124	0.04	0.6	0.976879	0.914894		0.00931966
		E%TA to A	0.0013099	0.0190017	0.00725002	0.290257	0.00702355	0.0412778		0.00241892
		E%TA to T	0.0013099	0.0190017	0.00725002	0.290257	0.00702355	0.0412778		0.00241892

## Sheet: _xltb_storage_
XL Toolbox Settings
	export_preset	<?xml version="1.0" encoding="utf-16"?>_x000D_ <Preset xmlns:xsd="http://www.w3.org/2001/XMLSchema" xmlns:xsi="http://www.w3.org/2001/XMLSchema-instance">_x000D_ <Name>Emf</Name>_x000D_ <Dpi>300</Dpi>_x000D_ <FileType>Emf</FileType>_x000D_ <ColorSpace>Rgb</ColorSpace>_x000D_ <Transparency>TransparentCanvas</Transparency>_x000D_ <UseColorProfile>false</UseColorProfile>_x000D_ <ColorProfile>sRGB Co…
	export_path	C:\Users\Priyadarshan\Desktop\Figures\gain_of_function_FAALs\figure_new1.emf

## Sheet: FinalGraph
					EcFAAL	MsFAAL32	RsFAAL
				1	Wt	Wt	Wt
				2	F275A	F284A	F264A
				3	M227A	M233A	M216A
				4	∆FSH254-257	∆FSH255-258	∆FSH240-243
				5	F275A& M227A	F284A& M233A	F264A& M216A
				6	F275A & A253G & M227A	F284A & V257A & M233A	F264A&M216A & I247G
