# Supplementary material for: A universal pocket in fatty acyl-AMP ligases ensures redirection of fatty acid pool away from coenzyme A-based activation
Source: eLife. 2021 Sep 7;10:e70067. doi: 10.7554/eLife.70067 (PMC8460268; doi:10.7554/eLife.70067)
Supplement: Figure 2—source data 3. — These values were obtained from densitometric quantification of the TLC images, which were used to plot Figure 2f. [file elife-70067-fig2-data3.xlsx]

## Sheet: RawData
		Wt	Wt	A253F	A253F	SFQLins	SFQLins	A253F& SFQLins	A253F& SFQLins	A253F & A210M	A253F & A210M	A253F& SFQLins & A210M	A253F& SFQLins & A210M	Control	Control
	MtFACL13	Acyl-AMP	Acyl-CoA	Acyl-AMP	Acyl-CoA	Acyl-AMP	Acyl-CoA	Acyl-AMP	Acyl-CoA	Acyl-AMP	Acyl-CoA	Acyl-AMP	Acyl-CoA	Acyl-AMP	Acyl-CoA
		3.3	66.3	5.5	1.1	11	5.7	16.1	0.5	4.4	64.5	23.9	2.8	0	0.1
		0.6	86.2	13.2	3.7	6.2	3.2	10.6	5.4	0.6	78.7	16.5	2.5	0.1	0.1
		3.1	59	5.9	1.1	8	3.4	7.2	0.3	3	63.8	11	2.6	0.1	0
		0.7	97.8	18.7	2.8	9.5	1.1	9.6	1.9	2.2	81.3	13	3	0.5	0.5
		2.8	85	13.7	3.4	9.4	2.8	10.6	2.4	2.7	80.2	21.9	3.3	0.2	0.1
	Ave	2.1	78.86	11.4	2.42	8.82	3.24	10.82	2.1	2.58	73.7	17.26	2.84	0.18	0.16
	SEM	0.597495	7.0798	2.51873	0.558032	0.80895	0.736614	1.4589	0.917061	0.615142	3.92212	2.48528	0.143527	0.0860233	0.087178
	AfFACL	Wt	Wt	A276F	A276F	SFQLins	SFQLins	A276F& SFQLins	A276F& SFQLins	A276F & A232M	A276F & A232M	A276F& SFQLins & A232M	A276F& SFQLins & A232M	Control	Control
		Acyl-AMP	Acyl-CoA	Acyl-AMP	Acyl-CoA	Acyl-AMP	Acyl-CoA	Acyl-AMP	Acyl-CoA	Acyl-AMP	Acyl-CoA	Acyl-AMP	Acyl-CoA	Acyl-AMP	Acyl-CoA
		0.4	99.1	2.4	70.1	0.3	76.6	2.2	10.4	7.1	0.3	52.4	1	0.1	0.1
		0.2	95.9	2.7	59.1	0.1	65.3	4.4	22.8	8.5	0.2	55.7	0.7	0.1	0
		0.3	98.4	2	69.7	0.1	64	5.1	23.2	4.9	0.3	49.2	0.8	0	0.1
	Ave	0.3	97.8	2.36667	66.3	0.166667	68.6333	3.9	18.8	6.83333	0.266667	52.4333	0.833333	0.0666667	0.0666667
	SEM	0.057735	0.971253	0.202759	3.60185	0.0666667	4.00097	0.873689	4.20159	1.04775	0.0333333	1.87646	0.0881917	0.0333333	0.0333333
	EcFACL	Wt	Wt	T308F	T308F	SFQLins	SFQLins	T308F& SFQLins	T308F& SFQLins	T308F & A264M	T308F & A264M	T308F& SFQLins & A264M	T308F& SFQLins & A264M	Control	Control
		Acyl-AMP	Acyl-CoA	Acyl-AMP	Acyl-CoA	Acyl-AMP	Acyl-CoA	Acyl-AMP	Acyl-CoA	Acyl-AMP	Acyl-CoA	Acyl-AMP	Acyl-CoA	Acyl-AMP	Acyl-CoA
		0.1	97.2	2	97.1	12.2	5.3	0.1	0.2	1.5	98.4	54.8	4.2	0.1	0.2
		0	98.9	2.1	97.2	15.8	5.2	0.1	0.2	0	99.7	54	4	0.1	0.1
		0.2	99.2	0.4	99.6	16.5	5.5	2.7	21.9	0.3	99.4	35.3	1	0.2	0.1
		0.4	98.9	0.4	88.4	9.1	0.7	2.2	10.2	0.3	92.9			0.2	0.2
		0.2	99.5			12.7	5.5			0	91.6
	Average	0.18	98.74	1.225	95.575	13.26	4.44	1.275	8.125	0.42	96.4	48.0333	3.06667	0.15	0.15
	SEM	0.0663325	0.400749	0.476751	2.46048	1.33589	0.936803	0.686021	5.16129	0.278209	1.72017	6.37085	1.03494	0.0288675	0.0288675

## Sheet: Percentage_Conversion
MtFACL13			WT	A253F	SFQLins	A253F& SFQLins	A253F & A210M	A253F& SFQLins & A210M	Control
	Avg	Acyl-AMP	2.1	11.4	8.82	10.82	2.58	17.26	0.18
		Acyl-CoA	78.86	2.42	3.24	2.1	73.7	2.84	0.16
	SEM	Acyl-AMP	0.597495	2.51873	0.80895	1.4589	0.615142	2.48528	0.0860233
		Acyl-CoA	7.0798	0.558032	0.736614	0.917061	3.92212	0.143527	0.087178
		%TA to A	0.0259387	0.824891	0.731343	0.837461	0.0338228	0.858706	0.529412
		%TA to T	0.974061	0.175109	0.268657	0.162539	0.966177	0.141294	0.470588
		E%TA to A	0.00756135	0.0468658	0.0500161	0.0439789	0.00627398	0.0110347
		E%TA to T	0.00756135	0.0468658	0.0500161	0.0439789	0.00627398	0.0110347
AfFACL			Wt	A276F	SFQLins	A276F& SFQLins	A276F & A232M	A276F& SFQLins & A232M	Control
	Avg	Acyl-AMP	0.3	2.36667	0.166667	3.9	6.83333	52.4333	0.0666667
		Acyl-CoA	97.8	66.3	68.6333	18.8	0.266667	0.833333	0.0666667
	SEM	Acyl-AMP	0.057735	0.202759	0.0666667	0.873689	1.04775	1.87646	0.0333333
		Acyl-CoA	0.971253	3.60185	4.00097	4.20159	0.0333333	0.0881917	0.0333333
		%TA to A	0.0030581	0.034466	0.00242248	0.171806	0.962441	0.984355	0.5
		%TA to T	0.996942	0.965534	0.997578	0.828194	0.0375587	0.0156446	0.5
		E%TA to A	0.000587807	0.0010562	0.000932986	0.000146496	0.000166677	0.00115631
		E%TA to T	0.000587807	0.0010562	0.000932986	0.000146496	0.000166677	0.00115631
EcFACL			Wt	T308F	SFQLins	T308F& SFQLins	T308F & A264M	T308F& SFQLins & A264M	Control
	Avg	Acyl-AMP	0.15	1.225	13.26	1.275	0.42	48.0333	0.15
		Acyl-CoA	98.8833	95.575	4.44	8.125	96.4	3.06667	0.15
	SEM	Acyl-AMP	0.0619139	0.476751	1.33589	0.686021	0.278209	6.37085	0.0288675
		Acyl-CoA	0.357227	2.46048	0.936803	5.16129	1.72017	1.03494	0.0288675
		%TA to A	0.00151464	0.012655	0.749153	0.135638	0.00433795	0.939987	0.5
		%TA to T	0.998485	0.987345	0.250847	0.864362	0.995662	0.060013	0.5
		E%TA to A	0.000607718	0.00463266	0.0217177	0.0099423	0.00284299	0.011876
		E%TA to T	0.000607718	0.00463266	0.0217177	0.0099423	0.00284299	0.011876

## Sheet: _xltb_storage_
XL Toolbox Settings
	export_preset	<?xml version="1.0" encoding="utf-16"?>_x000D_ <Preset xmlns:xsd="http://www.w3.org/2001/XMLSchema" xmlns:xsi="http://www.w3.org/2001/XMLSchema-instance">_x000D_ <Name>Emf</Name>_x000D_ <Dpi>300</Dpi>_x000D_ <FileType>Emf</FileType>_x000D_ <ColorSpace>Rgb</ColorSpace>_x000D_ <Transparency>TransparentCanvas</Transparency>_x000D_ <UseColorProfile>false</UseColorProfile>_x000D_ <ColorProfile>sRGB Co…
	export_path	C:\Users\Priyadarshan\Desktop\Figures\gain_of_function_FAALs\figure_new1.emf

## Sheet: FinalGraph
					MtFACL13	AfFACL	EcFACL
				1	A253F	Wt	Wt
				2	SFQLins	A276F	T308F
				3	A253F& SFQLins	SFQLins	SFQLins
				4	A253F & A210M	A276F& SFQLins	T308F& SFQLins
				5	A253F& SFQLins & A210M	A276F & A232M	T308F & A264M
				6	F275A & A253G & M227A	A276F& SFQLins & A232M	T308F& SFQLins & A264M
