# Supplementary material for: A universal pocket in fatty acyl-AMP ligases ensures redirection of fatty acid pool away from coenzyme A-based activation
Source: eLife. 2021 Sep 7;10:e70067. doi: 10.7554/eLife.70067 (PMC8460268; doi:10.7554/eLife.70067)
Supplement: Figure 2—source data 4. — The values are then converted to fraction of the total acyl-AMP (TA) formed to the remaining acyl-AMP (A) and the acyl-AMP converted to acyl-CoA (T). These values were obtained from densitometric quantification of the TLC images, which were used to plot Figure 2h. [file elife-70067-fig2-data4.xlsx]

## Sheet: RawData
	MsFAAL 32	WT	WT	∆FSH		∆FSI
		Acyl-AMP	Acyl-CoA	Acyl-AMP	Acyl-CoA	Acyl-AMP	Acyl-CoA
		13.4	0.5	0.4	1.6	30.4348	3.11704
		14.7	0.6	0.5	1.8	29.9882	2.58433
		13.5	0.1	0.4	3.2	30.2897	2.52694
		16.4	0.1	0.1	1.2
		15.3	0.1	0.3	1.5
	Ave	14.66	0.28	0.34	1.86	30.2376	2.74277
	SEM	0.564447	0.111355	0.0678233	0.348712	0.131551	0.187866
	RsFAAL	Wt	Wt	∆FSH		∆FSI
		Acyl-AMP	Acyl-CoA	Acyl-AMP	Acyl-CoA	Acyl-AMP	Acyl-CoA
		34.5	0.2	0.1	0.3	17.2357	6.2649
		32.5	0	0	0	17.7699	8.50496
		31.8	0	0.1	0	17.6899	10.477
		30.1	0.1	0	0	17.6421	11.911
		23.8	0	0	0	15.5482	6.18508
	Average	30.54	0.06	0.04	0.06	17.1772	8.66858
	SEM	1.82664	0.04	0.0244949	0.06	0.41756	1.13481

## Sheet: Percentage_Conversion
MsFAAL32			WT	∆FSH	∆FSI
	Avg	Acyl-AMP	14.66	0.34	30.2376
		Acyl-CoA	0.28	1.86	2.74277
	SEM	Acyl-AMP	0.564447	0.0678233	0.131551
		Acyl-CoA	0.111355	0.348712	0.187866
		%TA to A	98.1258	15.4545	91.6836
		%TA to T	1.87416	84.5455	8.31637
RsFAAL			Wt	∆FSH	∆FSI
	Avg	Acyl-AMP	30.54	0.04	17.1772
		Acyl-CoA	0.06	0.06	8.66858
	SEM	Acyl-AMP	1.82664	0.0244949	0.41756
		Acyl-CoA	0.04	0.06	1.13481
		%TA to A	99.8039	40	66.4603
		%TA to T	0.196078	60	33.5397

## Sheet: _xltb_storage_
XL Toolbox Settings
	export_preset	<?xml version="1.0" encoding="utf-16"?>_x000D_ <Preset xmlns:xsd="http://www.w3.org/2001/XMLSchema" xmlns:xsi="http://www.w3.org/2001/XMLSchema-instance">_x000D_ <Name>Emf</Name>_x000D_ <Dpi>300</Dpi>_x000D_ <FileType>Emf</FileType>_x000D_ <ColorSpace>Rgb</ColorSpace>_x000D_ <Transparency>TransparentCanvas</Transparency>_x000D_ <UseColorProfile>false</UseColorProfile>_x000D_ <ColorProfile>sRGB Co…
	export_path	C:\Users\Priyadarshan\Desktop\Figures\gain_of_function_FAALs\figure_new1.emf
