# Supplementary material for: A universal pocket in fatty acyl-AMP ligases ensures redirection of fatty acid pool away from coenzyme A-based activation
Source: eLife. 2021 Sep 7;10:e70067. doi: 10.7554/eLife.70067 (PMC8460268; doi:10.7554/eLife.70067)
Supplement: Figure 5—source data 1. — The bound CoA from the crystal structures of SeACS (PDB: 1PG4), AaCBCL (PDB: 3CW9), HsFACL (PDB: 3EQ6), and NtCCL (PDB: 5BSR) were used for the starting conformation of the head group of CoA. These crystal structures were then superimposed over the crystal structures of representative FAALs in adenylation competent state (A-state), EcFAAL (PDB: 3PBK), and MsFAAL32 (PDB: 5ICR), which were also used to generate the thioesterification competent state (T-state) by superimposing the C-terminal domain separately. The number of clashes was computed for every 1° rotation of the head group and then ranked as 3 if number ≥30, as 2 if number ≥10, and as 0 if number ≥1. These ranked values were used to plot Figure 5b and Figure 5—figure supplement 2a. [file elife-70067-fig5-data1.xlsx]

## Sheet: _xltb_storage_
XL Toolbox Settings
	export_preset	<?xml version="1.0" encoding="utf-16"?>_x000D_ <Preset xmlns:xsd="http://www.w3.org/2001/XMLSchema" xmlns:xsi="http://www.w3.org/2001/XMLSchema-instance">_x000D_ <Name>Png, 600 dpi, RGB, Transparent canvas</Name>_x000D_ <Dpi>600</Dpi>_x000D_ <FileType>Png</FileType>_x000D_ <ColorSpace>Rgb</ColorSpace>_x000D_ <Transparency>TransparentCanvas</Transparency>_x000D_ <UseColorProfile>false</UseColorPro…
	export_path	C:\Users\Priyadarshan\Desktop\Figures\MsFAAL32noncan_clash_Tstateranked.png

## Sheet: clashes_computed
	Clashes with main chain atoms in EcFAAL_Tstate				EcFAAL_Tstate_ranked				Clashes with main chain atoms in EcFAAL_Astate				EcFAAL_Astate_ranked				Clashes with main chain atoms in MsFAAL32_Astate				MsFAAL32_Astate_ranked				Clashes with main chain atoms in MsFAAL32_Tstate				MsFAAL32_Tstate_ranked
Angle (Degree)	1PG4_COA	3CW9_COA	3EQ6_COA	5BSR_COA	1PG4_COA	3CW9_COA	3EQ6_COA	5BSR_COA	1PG4_COA	3CW9_COA	3EQ6_COA	5BSR_COA	1PG4_COA	3CW9_COA	3EQ6_COA	5BSR_COA	1PG4_COA	3CW9_COA	3EQ6_COA	5BSR_COA	1PG4_COA	3CW9_COA	3EQ6_COA	5BSR_COA	1PG4_COA	3CW9_COA	3EQ6_COA	5BSR_COA	1PG4_COA	3CW9_COA	3EQ6_COA	5BSR_COA
1	42	24	27	26	3	2	2	2	37	17	26	24	3	2	2	2	27	27	32	30	2	2	3	3	23	20	31	27	2	2	3	2
2	42	22	26	25	3	2	2	2	37	17	26	24	3	2	2	2	28	28	29	31	2	2	2	3	24	21	28	28	2	2	2	2
3	39	23	28	24	3	2	2	2	36	17	25	24	3	2	2	2	29	28	28	32	2	2	2	3	25	21	27	29	2	2	2	2
4	38	24	27	24	3	2	2	2	34	17	27	24	3	2	2	2	31	28	27	34	3	2	2	3	27	21	26	30	2	2	2	3
5	37	24	26	23	3	2	2	2	33	18	27	24	3	2	2	2	34	27	30	35	3	2	3	3	30	21	29	31	3	2	2	3
6	36	23	26	23	3	2	2	2	31	18	27	22	3	2	2	2	34	26	30	36	3	2	3	3	29	21	29	32	2	2	2	3
7	36	22	27	22	3	2	2	2	32	17	28	22	3	2	2	2	34	26	32	36	3	2	3	3	29	21	31	32	2	2	3	3
8	34	23	28	22	3	2	2	2	31	16	30	21	3	2	3	2	34	26	34	34	3	2	3	3	28	20	33	30	2	2	3	3
9	34	23	31	22	3	2	3	2	32	15	30	21	3	2	3	2	35	26	33	36	3	2	3	3	30	20	32	32	3	2	3	3
10	32	24	31	22	3	2	3	2	31	15	30	23	3	2	3	2	37	26	32	37	3	2	3	3	32	20	32	33	3	2	3	3
11	33	25	29	23	3	2	2	2	32	15	28	24	3	2	2	2	37	26	32	39	3	2	3	3	32	20	32	35	3	2	3	3
12	32	24	29	23	3	2	2	2	33	15	28	24	3	2	2	2	38	27	32	37	3	2	3	3	33	21	32	33	3	2	3	3
13	32	23	28	23	3	2	2	2	33	15	27	25	3	2	2	2	38	27	33	38	3	2	3	3	33	21	33	34	3	2	3	3
14	32	23	23	25	3	2	2	2	32	16	26	24	3	2	2	2	38	26	32	38	3	2	3	3	33	19	32	35	3	2	3	3
15	33	21	23	24	3	2	2	2	32	15	24	23	3	2	2	2	38	26	32	40	3	2	3	3	33	19	32	37	3	2	3	3
16	34	22	21	23	3	2	2	2	34	15	22	23	3	2	2	2	38	26	31	39	3	2	3	3	33	19	31	36	3	2	3	3
17	35	22	21	23	3	2	2	2	34	15	21	24	3	2	2	2	39	26	30	41	3	2	3	3	34	19	30	38	3	2	3	3
18	35	21	19	23	3	2	2	2	35	16	20	23	3	2	2	2	40	27	30	40	3	2	3	3	35	20	30	38	3	2	3	3
19	35	21	20	25	3	2	2	2	36	16	20	24	3	2	2	2	41	27	30	39	3	2	3	3	36	19	30	37	3	2	3	3
20	35	20	19	25	3	2	2	2	35	14	20	24	3	2	2	2	41	26	30	40	3	2	3	3	35	20	30	38	3	2	3	3
21	34	20	19	25	3	2	2	2	35	15	20	25	3	2	2	2	40	25	31	40	3	2	3	3	35	20	31	39	3	2	3	3
22	35	20	20	26	3	2	2	2	34	15	20	27	3	2	2	2	40	25	30	40	3	2	3	3	35	20	30	40	3	2	3	3
23	35	19	19	26	3	2	2	2	34	16	20	27	3	2	2	2	40	25	30	41	3	2	3	3	35	20	30	41	3	2	3	3
24	35	19	19	25	3	2	2	2	34	16	18	29	3	2	2	2	40	26	33	42	3	2	3	3	35	20	33	42	3	2	3	3
25	35	19	21	25	3	2	2	2	35	16	18	26	3	2	2	2	41	26	32	41	3	2	3	3	37	20	32	41	3	2	3	3
26	36	19	19	26	3	2	2	2	36	16	19	27	3	2	2	2	42	24	31	41	3	2	3	3	38	20	31	41	3	2	3	3
27	36	19	17	26	3	2	2	2	37	15	18	27	3	2	2	2	43	24	31	42	3	2	3	3	39	20	31	42	3	2	3	3
28	36	18	18	26	3	2	2	2	36	14	16	25	3	2	2	2	43	23	32	41	3	2	3	3	39	18	32	41	3	2	3	3
29	36	17	16	29	3	2	2	2	36	14	15	24	3	2	2	2	44	23	33	40	3	2	3	3	40	17	33	40	3	2	3	3
30	36	17	16	26	3	2	2	2	36	14	14	22	3	2	2	2	44	24	30	42	3	2	3	3	41	18	30	42	3	2	3	3
31	37	15	17	25	3	2	2	2	36	14	16	23	3	2	2	2	42	23	30	41	3	2	3	3	39	18	30	41	3	2	3	3
32	37	15	16	25	3	2	2	2	35	15	16	24	3	2	2	2	42	23	28	42	3	2	2	3	39	18	28	42	3	2	2	3
33	34	15	18	26	3	2	2	2	34	15	16	26	3	2	2	2	44	22	27	42	3	2	2	3	41	17	27	42	3	2	2	3
34	34	15	18	27	3	2	2	2	34	15	16	27	3	2	2	2	41	21	27	42	3	2	2	3	38	17	27	42	3	2	2	3
35	33	16	19	27	3	2	2	2	32	16	17	27	3	2	2	2	39	21	27	42	3	2	2	3	37	17	27	42	3	2	2	3
36	35	16	18	27	3	2	2	2	34	16	18	26	3	2	2	2	40	18	28	42	3	2	2	3	38	16	28	42	3	2	2	3
37	34	16	18	27	3	2	2	2	34	16	18	26	3	2	2	2	37	19	27	41	3	2	2	3	36	17	27	41	3	2	2	3
38	34	15	19	27	3	2	2	2	33	15	19	24	3	2	2	2	38	18	26	38	3	2	2	3	37	17	26	38	3	2	2	3
39	32	15	18	25	3	2	2	2	33	15	18	23	3	2	2	2	37	19	25	36	3	2	2	3	36	18	25	36	3	2	2	3
40	32	15	18	24	3	2	2	2	34	16	18	22	3	2	2	2	35	17	25	35	3	2	2	3	35	16	25	35	3	2	2	3
41	33	16	18	25	3	2	2	2	34	16	19	23	3	2	2	2	33	17	23	34	3	2	2	3	33	16	23	34	3	2	2	3
42	33	16	18	26	3	2	2	2	33	15	19	25	3	2	2	2	32	17	23	33	3	2	2	3	32	16	23	33	3	2	2	3
43	32	16	18	28	3	2	2	2	31	14	20	25	3	2	2	2	34	16	22	34	3	2	2	3	34	15	22	34	3	2	2	3
44	33	16	18	29	3	2	2	2	30	15	20	25	3	2	2	2	34	14	19	34	3	2	2	3	34	13	19	34	3	2	2	3
45	32	16	19	27	3	2	2	2	31	15	20	25	3	2	2	2	31	13	18	34	3	2	2	3	31	12	18	34	3	2	2	3
46	31	15	19	25	3	2	2	2	30	15	19	24	3	2	2	2	29	13	18	33	2	2	2	3	29	12	18	33	2	2	2	3
47	31	15	19	24	3	2	2	2	29	15	19	25	2	2	2	2	29	12	18	32	2	2	2	3	29	12	18	32	2	2	2	3
48	29	15	19	27	2	2	2	2	29	15	19	27	2	2	2	2	27	12	18	33	2	2	2	3	27	12	18	33	2	2	2	3
49	29	15	19	26	2	2	2	2	29	15	19	26	2	2	2	2	27	12	17	32	2	2	2	3	27	12	17	32	2	2	2	3
50	29	15	19	27	2	2	2	2	29	15	18	27	2	2	2	2	27	12	18	30	2	2	2	3	27	12	18	30	2	2	2	3
51	29	15	18	28	2	2	2	2	30	16	18	29	3	2	2	2	27	12	18	32	2	2	2	3	27	12	18	32	2	2	2	3
52	30	15	18	30	3	2	2	3	29	15	18	30	2	2	2	3	26	15	18	34	2	2	2	3	26	15	18	34	2	2	2	3
53	29	14	18	31	2	2	2	3	28	15	18	30	2	2	2	3	26	15	17	34	2	2	2	3	26	15	17	34	2	2	2	3
54	29	15	18	33	2	2	2	3	25	16	18	31	2	2	2	3	23	15	16	36	2	2	2	3	23	15	16	36	2	2	2	3
55	26	16	16	34	2	2	2	3	24	16	18	33	2	2	2	3	22	15	16	36	2	2	2	3	22	15	16	36	2	2	2	3
56	26	16	16	33	2	2	2	3	25	18	18	34	2	2	2	3	22	15	16	35	2	2	2	3	22	15	16	35	2	2	2	3
57	23	17	17	35	2	2	2	3	22	18	18	34	2	2	2	3	23	14	17	35	2	2	2	3	23	14	17	35	2	2	2	3
58	23	17	16	36	2	2	2	3	22	18	17	35	2	2	2	3	23	14	17	35	2	2	2	3	23	14	17	35	2	2	2	3
59	22	17	15	36	2	2	2	3	19	17	16	35	2	2	2	3	22	13	18	35	2	2	2	3	22	13	18	35	2	2	2	3
60	21	17	15	34	2	2	2	3	19	17	15	34	2	2	2	3	22	13	16	34	2	2	2	3	22	13	16	34	2	2	2	3
61	19	17	14	34	2	2	2	3	19	17	14	33	2	2	2	3	22	13	16	33	2	2	2	3	22	13	16	33	2	2	2	3
62	21	17	13	33	2	2	2	3	20	19	15	33	2	2	2	3	21	13	18	33	2	2	2	3	21	13	18	33	2	2	2	3
63	21	17	13	32	2	2	2	3	22	19	16	33	2	2	2	3	21	15	19	32	2	2	2	3	21	15	19	32	2	2	2	3
64	23	17	16	31	2	2	2	3	23	19	17	33	2	2	2	3	22	15	21	32	2	2	2	3	22	15	21	32	2	2	2	3
65	23	18	17	31	2	2	2	3	23	20	17	32	2	2	2	3	21	15	22	31	2	2	2	3	21	15	22	31	2	2	2	3
66	22	19	17	32	2	2	2	3	22	23	16	32	2	2	2	3	21	15	22	31	2	2	2	3	21	15	22	31	2	2	2	3
67	22	20	16	32	2	2	2	3	22	23	16	32	2	2	2	3	20	15	23	31	2	2	2	3	20	15	23	31	2	2	2	3
68	21	22	17	32	2	2	2	3	21	21	16	32	2	2	2	3	20	14	23	30	2	2	2	3	20	14	23	30	2	2	2	3
69	21	22	17	31	2	2	2	3	20	21	20	30	2	2	2	3	19	14	22	29	2	2	2	2	19	14	22	29	2	2	2	2
70	21	20	20	30	2	2	2	3	19	21	22	30	2	2	2	3	18	14	24	29	2	2	2	2	18	14	24	29	2	2	2	2
71	20	20	23	29	2	2	2	2	19	19	24	30	2	2	2	3	18	14	26	29	2	2	2	2	18	14	26	29	2	2	2	2
72	20	19	24	26	2	2	2	2	20	19	24	27	2	2	2	2	17	14	27	29	2	2	2	2	17	14	27	29	2	2	2	2
73	20	18	25	25	2	2	2	2	20	19	25	25	2	2	2	2	16	14	28	29	2	2	2	2	16	14	28	29	2	2	2	2
74	21	19	25	25	2	2	2	2	19	19	26	24	2	2	2	2	16	14	27	29	2	2	2	2	16	14	27	29	2	2	2	2
75	20	19	27	24	2	2	2	2	19	19	27	24	2	2	2	2	16	13	29	26	2	2	2	2	16	13	29	26	2	2	2	2
76	21	19	29	22	2	2	2	2	20	20	28	23	2	2	2	2	16	12	30	25	2	2	3	2	16	12	30	25	2	2	3	2
77	20	20	30	23	2	2	3	2	20	21	30	23	2	2	3	2	15	13	30	25	2	2	3	2	15	13	30	25	2	2	3	2
78	19	19	29	22	2	2	2	2	19	21	29	21	2	2	2	2	15	13	30	24	2	2	3	2	15	13	30	24	2	2	3	2
79	19	19	30	20	2	2	3	2	19	21	29	20	2	2	2	2	14	15	30	23	2	2	3	2	14	15	30	23	2	2	3	2
80	19	19	30	20	2	2	3	2	19	18	30	20	2	2	3	2	13	16	30	23	2	2	3	2	13	16	30	23	2	2	3	2
81	19	17	30	21	2	2	3	2	19	18	30	21	2	2	3	2	13	17	30	22	2	2	3	2	13	17	30	22	2	2	3	2
82	19	16	29	20	2	2	2	2	19	18	30	20	2	2	3	2	12	17	30	23	2	2	3	2	12	17	30	23	2	2	3	2
83	19	17	31	19	2	2	3	2	19	17	31	19	2	2	3	2	12	17	29	23	2	2	2	2	12	17	29	23	2	2	2	2
84	19	18	32	19	2	2	3	2	19	18	33	20	2	2	3	2	13	17	30	24	2	2	3	2	13	17	30	24	2	2	3	2
85	18	19	33	20	2	2	3	2	18	19	33	20	2	2	3	2	13	17	30	24	2	2	3	2	13	17	30	24	2	2	3	2
86	19	20	31	20	2	2	3	2	17	18	32	20	2	2	3	2	14	17	29	25	2	2	2	2	14	17	29	25	2	2	2	2
87	19	19	31	21	2	2	3	2	17	18	32	21	2	2	3	2	15	16	31	24	2	2	3	2	15	16	31	24	2	2	3	2
88	19	18	32	23	2	2	3	2	18	18	32	22	2	2	3	2	14	16	31	25	2	2	3	2	14	16	31	25	2	2	3	2
89	18	18	32	22	2	2	3	2	19	17	31	22	2	2	3	2	14	18	29	26	2	2	2	2	14	18	29	26	2	2	2	2
90	17	18	32	23	2	2	3	2	18	17	32	22	2	2	3	2	14	18	28	29	2	2	2	2	14	18	28	29	2	2	2	2
91	17	18	32	23	2	2	3	2	18	17	32	22	2	2	3	2	14	18	28	29	2	2	2	2	14	18	28	29	2	2	2	2
92	17	18	32	22	2	2	3	2	17	17	31	22	2	2	3	2	14	17	28	29	2	2	2	2	14	17	28	29	2	2	2	2
93	17	18	29	22	2	2	2	2	17	18	29	23	2	2	2	2	18	17	27	28	2	2	2	2	18	17	27	28	2	2	2	2
94	17	18	28	23	2	2	2	2	17	18	29	22	2	2	2	2	20	18	27	28	2	2	2	2	20	18	27	28	2	2	2	2
95	18	18	28	24	2	2	2	2	15	18	28	24	2	2	2	2	23	19	28	27	2	2	2	2	23	19	28	27	2	2	2	2
96	17	18	28	23	2	2	2	2	15	18	27	24	2	2	2	2	24	19	27	29	2	2	2	2	24	19	27	29	2	2	2	2
97	19	19	28	24	2	2	2	2	19	19	26	26	2	2	2	2	24	19	27	29	2	2	2	2	24	19	27	29	2	2	2	2
98	21	19	26	27	2	2	2	2	18	18	26	27	2	2	2	2	25	20	25	29	2	2	2	2	25	20	25	29	2	2	2	2
99	23	17	26	29	2	2	2	2	19	18	25	29	2	2	2	2	25	20	23	30	2	2	2	3	25	20	23	30	2	2	2	3
100	24	17	26	28	2	2	2	2	22	17	25	28	2	2	2	2	26	22	23	30	2	2	2	3	26	22	23	30	2	2	2	3
101	25	17	26	29	2	2	2	2	24	18	27	29	2	2	2	2	27	23	23	32	2	2	2	3	27	23	23	32	2	2	2	3
102	27	20	27	29	2	2	2	2	26	20	26	31	2	2	2	3	28	23	22	33	2	2	2	3	28	23	22	33	2	2	2	3
103	27	20	27	32	2	2	2	3	25	20	26	32	2	2	2	3	29	24	21	32	2	2	2	3	29	24	21	32	2	2	2	3
104	27	20	25	32	2	2	2	3	24	20	26	34	2	2	2	3	30	23	22	32	3	2	2	3	30	23	22	32	3	2	2	3
105	26	20	24	33	2	2	2	3	26	20	26	34	2	2	2	3	30	27	22	31	3	2	2	3	30	27	22	31	3	2	2	3
106	28	19	25	33	2	2	2	3	29	18	26	33	2	2	2	3	29	27	22	32	2	2	2	3	29	27	22	32	2	2	2	3
107	29	18	26	34	2	2	2	3	31	18	24	34	3	2	2	3	30	29	25	33	3	2	2	3	30	29	25	33	3	2	2	3
108	31	18	25	34	3	2	2	3	32	18	26	34	3	2	2	3	32	29	28	34	3	2	2	3	32	29	28	34	3	2	2	3
109	32	18	26	35	3	2	2	3	33	19	26	33	3	2	2	3	31	29	29	34	3	2	2	3	31	29	29	34	3	2	2	3
110	33	19	26	32	3	2	2	3	33	20	29	32	3	2	2	3	31	30	30	34	3	3	3	3	31	30	30	34	3	3	3	3
111	34	20	28	32	3	2	2	3	32	20	30	31	3	2	3	3	31	33	30	33	3	3	3	3	31	33	30	33	3	3	3	3
112	34	20	30	30	3	2	3	3	34	21	30	31	3	2	3	3	32	33	32	32	3	3	3	3	32	33	32	32	3	3	3	3
113	34	21	29	31	3	2	2	3	33	21	28	33	3	2	2	3	33	33	34	33	3	3	3	3	33	33	34	33	3	3	3	3
114	35	23	29	32	3	2	2	3	32	22	28	32	3	2	2	3	34	33	35	31	3	3	3	3	34	33	35	31	3	3	3	3
115	34	24	32	31	3	2	3	3	32	23	30	31	3	2	3	3	36	34	35	32	3	3	3	3	36	34	35	32	3	3	3	3
116	34	24	33	30	3	2	3	3	32	23	30	31	3	2	3	3	39	34	37	33	3	3	3	3	39	34	37	33	3	3	3	3
117	34	25	32	29	3	2	3	2	32	25	31	30	3	2	3	3	39	35	36	33	3	3	3	3	39	35	36	33	3	3	3	3
118	33	25	32	29	3	2	3	2	33	26	34	30	3	2	3	3	38	35	36	34	3	3	3	3	38	35	36	34	3	3	3	3
119	36	25	34	29	3	2	3	2	34	26	35	28	3	2	3	2	39	35	37	33	3	3	3	3	39	35	37	33	3	3	3	3
120	36	26	34	29	3	2	3	2	34	26	36	30	3	2	3	3	38	36	41	33	3	3	3	3	38	36	41	33	3	3	3	3
121	35	25	34	30	3	2	3	3	34	27	36	30	3	2	3	3	38	35	41	34	3	3	3	3	38	35	41	34	3	3	3	3
122	34	25	34	30	3	2	3	3	35	27	36	29	3	2	3	2	37	36	41	33	3	3	3	3	37	36	41	33	3	3	3	3
123	34	25	34	28	3	2	3	2	36	27	36	30	3	2	3	3	36	36	44	33	3	3	3	3	36	36	44	33	3	3	3	3
124	35	25	34	29	3	2	3	2	36	28	35	29	3	2	3	2	37	37	46	32	3	3	3	3	37	37	46	32	3	3	3	3
125	35	26	38	27	3	2	3	2	35	28	37	31	3	2	3	3	36	38	48	33	3	3	3	3	36	38	48	33	3	3	3	3
126	36	28	38	29	3	2	3	2	35	29	38	32	3	2	3	3	36	39	50	32	3	3	3	3	36	39	50	32	3	3	3	3
127	35	28	38	29	3	2	3	2	36	29	39	32	3	2	3	3	36	38	49	34	3	3	3	3	36	38	49	34	3	3	3	3
128	33	27	40	30	3	2	3	3	34	29	39	32	3	2	3	3	37	38	49	36	3	3	3	3	37	38	49	36	3	3	3	3
129	32	27	42	32	3	2	3	3	32	28	42	32	3	2	3	3	37	38	50	35	3	3	3	3	37	38	50	35	3	3	3	3
130	33	29	42	34	3	2	3	3	33	30	42	34	3	3	3	3	37	37	51	34	3	3	3	3	37	37	51	34	3	3	3	3
131	32	32	43	35	3	3	3	3	32	30	43	35	3	3	3	3	36	36	52	36	3	3	3	3	36	36	52	36	3	3	3	3
132	32	33	43	37	3	3	3	3	31	33	44	38	3	3	3	3	36	35	53	36	3	3	3	3	36	35	53	36	3	3	3	3
133	32	34	46	36	3	3	3	3	34	35	47	39	3	3	3	3	36	35	56	39	3	3	3	3	36	35	56	39	3	3	3	3
134	36	33	49	36	3	3	3	3	34	35	49	37	3	3	3	3	36	35	56	40	3	3	3	3	36	35	56	40	3	3	3	3
135	35	33	51	37	3	3	3	3	33	35	51	40	3	3	3	3	36	35	56	39	3	3	3	3	36	35	56	39	3	3	3	3
136	34	35	53	37	3	3	3	3	33	35	52	38	3	3	3	3	36	36	54	40	3	3	3	3	36	36	54	40	3	3	3	3
137	34	34	53	38	3	3	3	3	33	35	53	38	3	3	3	3	35	37	50	41	3	3	3	3	35	37	50	41	3	3	3	3
138	33	35	53	38	3	3	3	3	35	35	53	40	3	3	3	3	34	36	50	40	3	3	3	3	34	36	50	40	3	3	3	3
139	35	35	52	40	3	3	3	3	35	35	52	40	3	3	3	3	34	37	49	40	3	3	3	3	34	37	49	40	3	3	3	3
140	35	35	52	41	3	3	3	3	34	34	53	41	3	3	3	3	34	36	48	42	3	3	3	3	34	36	48	42	3	3	3	3
141	34	34	53	40	3	3	3	3	35	34	49	40	3	3	3	3	35	36	47	44	3	3	3	3	35	36	47	44	3	3	3	3
142	34	34	49	40	3	3	3	3	35	34	49	40	3	3	3	3	36	36	46	46	3	3	3	3	36	36	46	46	3	3	3	3
143	33	34	49	41	3	3	3	3	35	34	48	43	3	3	3	3	37	36	47	49	3	3	3	3	37	35	47	49	3	3	3	3
144	33	34	49	45	3	3	3	3	35	32	49	43	3	3	3	3	37	36	45	47	3	3	3	3	37	35	45	47	3	3	3	3
145	33	33	49	46	3	3	3	3	35	32	48	45	3	3	3	3	37	35	44	48	3	3	3	3	37	34	44	48	3	3	3	3
146	33	33	46	47	3	3	3	3	35	32	46	44	3	3	3	3	36	36	44	47	3	3	3	3	36	35	44	47	3	3	3	3
147	35	32	46	47	3	3	3	3	34	31	45	46	3	3	3	3	36	36	44	47	3	3	3	3	36	35	44	47	3	3	3	3
148	35	32	44	47	3	3	3	3	35	31	43	47	3	3	3	3	36	36	45	49	3	3	3	3	36	35	45	49	3	3	3	3
149	35	31	44	47	3	3	3	3	36	33	45	47	3	3	3	3	36	35	48	49	3	3	3	3	36	34	48	49	3	3	3	3
150	36	32	43	49	3	3	3	3	35	31	46	47	3	3	3	3	36	35	47	49	3	3	3	3	36	34	47	49	3	3	3	3
151	36	32	45	50	3	3	3	3	35	31	45	48	3	3	3	3	36	33	47	49	3	3	3	3	36	32	47	49	3	3	3	3
152	35	31	46	49	3	3	3	3	34	31	45	48	3	3	3	3	34	33	47	48	3	3	3	3	34	32	47	48	3	3	3	3
153	35	31	45	50	3	3	3	3	34	32	45	45	3	3	3	3	31	34	48	45	3	3	3	3	31	33	48	45	3	3	3	3
154	33	31	44	52	3	3	3	3	33	32	47	45	3	3	3	3	32	35	49	45	3	3	3	3	32	34	49	45	3	3	3	3
155	32	31	46	52	3	3	3	3	32	31	46	46	3	3	3	3	32	33	47	46	3	3	3	3	32	32	47	46	3	3	3	3
156	31	30	46	50	3	3	3	3	31	31	47	47	3	3	3	3	31	33	47	47	3	3	3	3	31	32	47	47	3	3	3	3
157	31	30	47	49	3	3	3	3	32	32	47	46	3	3	3	3	33	32	48	47	3	3	3	3	33	31	48	47	3	3	3	3
158	32	31	47	49	3	3	3	3	32	32	46	44	3	3	3	3	34	32	48	47	3	3	3	3	34	31	48	47	3	3	3	3
159	32	31	48	49	3	3	3	3	33	33	47	45	3	3	3	3	34	32	47	46	3	3	3	3	34	31	47	46	3	3	3	3
160	33	31	46	49	3	3	3	3	33	35	45	44	3	3	3	3	33	33	46	46	3	3	3	3	33	32	46	46	3	3	3	3
161	36	35	46	50	3	3	3	3	34	36	45	45	3	3	3	3	34	35	46	46	3	3	3	3	34	34	46	46	3	3	3	3
162	35	35	45	48	3	3	3	3	34	36	45	47	3	3	3	3	35	36	45	46	3	3	3	3	35	35	45	46	3	3	3	3
163	36	35	45	48	3	3	3	3	34	38	43	47	3	3	3	3	37	37	45	46	3	3	3	3	37	36	45	46	3	3	3	3
164	37	36	43	48	3	3	3	3	34	38	43	47	3	3	3	3	36	38	44	46	3	3	3	3	36	37	44	46	3	3	3	3
165	38	37	43	48	3	3	3	3	35	39	42	46	3	3	3	3	36	38	42	47	3	3	3	3	36	37	42	47	3	3	3	3
166	37	37	43	47	3	3	3	3	35	38	41	45	3	3	3	3	36	37	42	48	3	3	3	3	36	36	42	48	3	3	3	3
167	38	38	40	46	3	3	3	3	37	39	40	45	3	3	3	3	38	37	41	46	3	3	3	3	38	36	41	46	3	3	3	3
168	38	40	40	47	3	3	3	3	38	40	40	43	3	3	3	3	38	38	41	49	3	3	3	3	38	37	41	49	3	3	3	3
169	38	42	40	46	3	3	3	3	38	41	39	44	3	3	3	3	39	40	42	50	3	3	3	3	39	39	42	50	3	3	3	3
170	41	43	39	45	3	3	3	3	38	41	38	43	3	3	3	3	40	42	41	50	3	3	3	3	40	41	41	50	3	3	3	3
171	40	44	39	43	3	3	3	3	40	43	38	40	3	3	3	3	40	43	43	52	3	3	3	3	40	42	43	52	3	3	3	3
172	41	43	38	46	3	3	3	3	43	42	38	43	3	3	3	3	40	44	43	50	3	3	3	3	40	42	43	50	3	3	3	3
173	43	44	38	46	3	3	3	3	41	41	38	45	3	3	3	3	42	45	42	52	3	3	3	3	42	43	42	52	3	3	3	3
174	44	44	39	47	3	3	3	3	42	44	38	46	3	3	3	3	43	45	42	52	3	3	3	3	43	43	42	52	3	3	3	3
175	43	44	39	51	3	3	3	3	43	44	38	48	3	3	3	3	43	45	42	53	3	3	3	3	43	43	42	53	3	3	3	3
176	43	44	40	50	3	3	3	3	42	45	38	49	3	3	3	3	44	47	42	54	3	3	3	3	44	45	42	54	3	3	3	3
177	44	44	38	48	3	3	3	3	44	46	40	48	3	3	3	3	44	47	41	53	3	3	3	3	44	45	41	53	3	3	3	3
178	46	46	38	49	3	3	3	3	45	46	38	50	3	3	3	3	44	49	41	54	3	3	3	3	44	45	41	54	3	3	3	3
179	46	45	35	49	3	3	3	3	45	45	36	50	3	3	3	3	46	51	41	53	3	3	3	3	46	47	41	53	3	3	3	3
180	44	44	35	50	3	3	3	3	44	45	35	50	3	3	3	3	47	51	40	53	3	3	3	3	47	47	40	53	3	3	3	3
181	44	44	35	50	3	3	3	3	44	45	35	50	3	3	3	3	47	51	40	53	3	3	3	3	47	47	40	53	3	3	3	3
182	44	44	34	50	3	3	3	3	41	44	35	51	3	3	3	3	47	51	39	54	3	3	3	3	47	47	39	54	3	3	3	3
183	44	45	34	50	3	3	3	3	42	46	34	52	3	3	3	3	47	52	39	55	3	3	3	3	47	48	39	55	3	3	3	3
184	44	45	34	51	3	3	3	3	43	46	34	51	3	3	3	3	47	52	40	52	3	3	3	3	47	48	38	52	3	3	3	3
185	44	46	34	50	3	3	3	3	43	46	33	52	3	3	3	3	47	52	39	52	3	3	3	3	47	48	37	52	3	3	3	3
186	43	46	33	50	3	3	3	3	45	47	33	52	3	3	3	3	48	52	38	53	3	3	3	3	48	48	36	53	3	3	3	3
187	46	46	33	52	3	3	3	3	46	47	32	51	3	3	3	3	50	52	37	52	3	3	3	3	50	48	35	52	3	3	3	3
188	47	46	33	51	3	3	3	3	46	47	33	50	3	3	3	3	47	53	37	52	3	3	3	3	47	49	35	52	3	3	3	3
189	47	47	33	52	3	3	3	3	46	46	33	50	3	3	3	3	49	52	36	53	3	3	3	3	49	48	34	53	3	3	3	3
190	48	48	32	52	3	3	3	3	46	46	32	50	3	3	3	3	48	52	35	52	3	3	3	3	48	48	33	52	3	3	3	3
191	48	47	31	52	3	3	3	3	47	47	32	52	3	3	3	3	50	52	36	52	3	3	3	3	50	48	33	52	3	3	3	3
192	49	48	31	51	3	3	3	3	49	48	30	51	3	3	3	3	49	53	34	50	3	3	3	3	49	48	31	50	3	3	3	3
193	49	48	32	51	3	3	3	3	48	48	30	51	3	3	3	3	48	52	34	50	3	3	3	3	48	47	31	50	3	3	3	3
194	49	48	30	51	3	3	3	3	49	48	30	49	3	3	3	3	48	53	35	50	3	3	3	3	48	47	31	50	3	3	3	3
195	48	47	30	50	3	3	3	3	49	48	30	49	3	3	3	3	49	52	35	50	3	3	3	3	49	46	31	50	3	3	3	3
196	49	47	30	48	3	3	3	3	50	47	30	48	3	3	3	3	49	51	34	51	3	3	3	3	49	45	30	51	3	3	3	3
197	48	46	29	49	3	3	2	3	50	47	29	48	3	3	2	3	48	51	35	50	3	3	3	3	48	45	30	50	3	3	3	3
198	48	45	28	47	3	3	2	3	48	47	29	46	3	3	2	3	48	50	33	49	3	3	3	3	48	44	28	49	3	3	2	3
199	46	45	27	46	3	3	2	3	47	45	28	46	3	3	2	3	48	49	32	48	3	3	3	3	49	43	26	48	3	3	2	3
200	45	44	27	45	3	3	2	3	46	44	28	44	3	3	2	3	48	49	34	46	3	3	3	3	50	43	26	46	3	3	2	3
201	45	43	27	44	3	3	2	3	46	44	27	44	3	3	2	3	49	48	31	44	3	3	3	3	51	42	23	44	3	3	2	3
202	45	43	26	44	3	3	2	3	46	43	26	43	3	3	2	3	49	45	30	42	3	3	3	3	52	39	22	42	3	3	2	3
203	46	43	25	43	3	3	2	3	46	42	25	42	3	3	2	3	47	44	30	42	3	3	3	3	50	38	22	42	3	3	2	3
204	45	43	25	42	3	3	2	3	45	42	23	40	3	3	2	3	45	44	31	40	3	3	3	3	49	38	22	40	3	3	2	3
205	44	42	21	40	3	3	2	3	43	39	22	40	3	3	2	3	44	44	31	39	3	3	3	3	48	38	21	39	3	3	2	3
206	42	37	21	39	3	3	2	3	42	38	21	40	3	3	2	3	40	43	29	39	3	3	2	3	44	37	19	39	3	3	2	3
207	42	36	21	37	3	3	2	3	41	38	21	38	3	3	2	3	40	44	29	39	3	3	2	3	44	37	19	39	3	3	2	3
208	39	36	20	35	3	3	2	3	38	36	20	36	3	3	2	3	40	45	30	39	3	3	3	3	44	37	19	39	3	3	2	3
209	38	35	20	35	3	3	2	3	36	36	18	34	3	3	2	3	40	46	31	36	3	3	3	3	44	37	19	36	3	3	2	3
210	37	35	19	35	3	3	2	3	35	35	18	34	3	3	2	3	40	46	32	35	3	3	3	3	44	37	18	35	3	3	2	3
211	36	35	18	32	3	3	2	3	35	34	18	32	3	3	2	3	40	45	31	35	3	3	3	3	44	36	17	34	3	3	2	3
212	35	35	18	30	3	3	2	3	34	34	18	30	3	3	2	3	38	44	30	34	3	3	3	3	42	34	16	33	3	3	2	3
213	34	35	16	28	3	3	2	2	34	34	17	29	3	3	2	2	37	45	30	33	3	3	3	3	41	34	16	32	3	3	2	3
214	32	34	15	25	3	3	2	2	31	34	16	27	3	3	2	2	35	46	29	32	3	3	2	3	39	34	15	31	3	3	2	3
215	31	34	15	25	3	3	2	2	31	32	16	26	3	3	2	2	34	46	29	31	3	3	2	3	38	34	15	29	3	3	2	2
216	29	32	14	23	2	3	2	2	28	31	14	26	2	3	2	2	34	46	28	28	3	3	2	2	37	34	14	26	3	3	2	2
217	29	31	14	23	2	3	2	2	27	31	14	21	2	3	2	2	34	44	27	27	3	3	2	2	35	32	13	25	3	3	2	2
218	27	30	13	21	2	3	2	2	26	30	14	21	2	3	2	2	32	45	27	25	3	3	2	2	33	31	13	22	3	3	2	2
219	24	28	12	18	2	2	2	2	24	29	11	19	2	2	2	2	31	43	26	24	3	3	2	2	31	29	12	21	3	2	2	2
220	23	28	13	18	2	2	2	2	22	27	10	19	2	2	2	2	30	41	28	27	3	3	2	2	31	28	13	21	3	2	2	2
221	23	26	12	17	2	2	2	2	22	27	10	19	2	2	2	2	30	40	28	27	3	3	2	2	30	27	14	21	3	2	2	2
222	23	25	13	17	2	2	2	2	22	26	10	18	2	2	2	2	30	38	28	26	3	3	2	2	30	25	16	19	3	2	2	2
223	21	25	12	17	2	2	2	2	21	26	9	17	2	2	1	2	29	39	28	25	2	3	2	2	30	23	15	18	3	2	2	2
224	21	24	12	15	2	2	2	2	21	25	8	16	2	2	1	2	29	38	27	27	2	3	2	2	29	22	14	17	2	2	2	2
225	21	22	15	15	2	2	2	2	21	23	8	16	2	2	1	2	28	37	28	27	2	3	2	2	28	21	14	17	2	2	2	2
226	21	21	14	13	2	2	2	2	20	22	8	14	2	2	1	2	28	37	30	26	2	3	3	2	28	20	14	16	2	2	2	2
227	19	21	15	12	2	2	2	2	18	22	8	12	2	2	1	2	26	37	33	23	2	3	3	2	25	20	14	13	2	2	2	2
228	19	21	15	11	2	2	2	2	17	21	8	12	2	2	1	2	27	38	34	25	2	3	3	2	25	20	15	13	2	2	2	2
229	18	19	16	10	2	2	2	2	16	19	8	13	2	2	1	2	27	39	33	24	2	3	3	2	25	20	14	12	2	2	2	2
230	16	19	15	10	2	2	2	2	16	19	8	13	2	2	1	2	29	39	33	23	2	3	3	2	24	19	14	11	2	2	2	2
231	15	19	17	9	2	2	2	1	15	18	8	11	2	2	1	2	29	38	34	23	2	3	3	2	23	18	15	10	2	2	2	2
232	15	18	17	8	2	2	2	1	12	18	8	12	2	2	1	2	28	38	34	21	2	3	3	2	21	18	14	8	2	2	2	1
233	12	17	17	8	2	2	2	1	12	16	7	13	2	2	1	2	28	40	34	21	2	3	3	2	20	18	15	8	2	2	2	1
234	12	16	17	8	2	2	2	1	11	16	8	13	2	2	1	2	28	39	35	22	2	3	3	2	20	17	15	7	2	2	2	1
235	11	15	17	8	2	2	2	1	11	15	9	12	2	2	1	2	28	38	35	22	2	3	3	2	20	15	14	7	2	2	2	1
236	11	15	17	7	2	2	2	1	11	15	8	12	2	2	1	2	28	39	35	21	2	3	3	2	20	15	13	6	2	2	2	1
237	9	13	16	5	1	2	2	1	9	14	9	11	1	2	1	2	27	39	35	22	2	3	3	2	19	15	15	6	2	2	2	1
238	9	13	16	5	1	2	2	1	8	14	10	10	1	2	2	2	29	38	35	22	2	3	3	2	19	13	17	6	2	2	2	1
239	9	13	15	5	1	2	2	1	8	14	10	10	1	2	2	2	29	38	34	23	2	3	3	2	18	13	15	6	2	2	2	1
240	9	13	15	5	1	2	2	1	8	13	9	12	1	2	1	2	30	38	34	23	3	3	3	2	18	13	15	5	2	2	2	1
241	8	14	16	3	1	2	2	1	8	12	11	12	1	2	2	2	29	38	35	22	2	3	3	2	17	13	14	5	2	2	2	1
242	7	13	15	3	1	2	2	1	8	12	11	11	1	2	2	2	29	38	36	22	2	3	3	2	16	13	14	5	2	2	2	1
243	7	13	15	5	1	2	2	1	9	12	11	11	1	2	2	2	28	38	35	20	2	3	3	2	14	12	14	4	2	2	2	1
244	6	13	15	4	1	2	2	1	8	12	10	9	1	2	2	1	27	39	36	20	2	3	3	2	12	12	14	4	2	2	2	1
245	6	12	15	5	1	2	2	1	7	11	10	9	1	2	2	1	27	38	36	20	2	3	3	2	11	11	14	5	2	2	2	1
246	5	12	16	7	1	2	2	1	6	11	10	9	1	2	2	1	27	39	36	22	2	3	3	2	10	11	14	6	2	2	2	1
247	4	12	15	7	1	2	2	1	5	10	9	7	1	2	1	1	28	39	37	24	2	3	3	2	10	11	14	7	2	2	2	1
248	4	11	16	7	1	2	2	1	5	10	9	7	1	2	1	1	28	39	36	25	2	3	3	2	9	10	14	7	1	2	2	1
249	4	11	17	8	1	2	2	1	5	10	9	7	1	2	1	1	29	39	37	27	2	3	3	2	9	10	14	10	1	2	2	2
250	4	10	18	9	1	2	2	1	5	8	9	7	1	1	1	1	31	38	39	29	3	3	3	2	9	10	15	11	1	2	2	2
251	4	9	19	10	1	1	2	2	5	8	8	6	1	1	1	1	31	38	39	28	3	3	3	2	8	9	18	11	1	1	2	2
252	4	8	21	10	1	1	2	2	5	7	8	5	1	1	1	1	31	38	40	28	3	3	3	2	8	9	19	12	1	1	2	2
253	5	8	21	10	1	1	2	2	6	7	8	6	1	1	1	1	31	38	37	31	3	3	3	3	8	8	18	12	1	1	2	2
254	5	8	21	11	1	1	2	2	6	8	8	8	1	1	1	1	31	38	36	32	3	3	3	3	8	8	20	13	1	1	2	2
255	4	8	23	12	1	1	2	2	5	8	8	10	1	1	1	2	31	37	37	34	3	3	3	3	8	7	21	12	1	1	2	2
256	3	8	23	14	1	1	2	2	5	7	8	10	1	1	1	2	32	35	38	35	3	3	3	3	8	5	21	12	1	1	2	2
257	4	7	23	15	1	1	2	2	4	7	7	9	1	1	1	1	34	35	40	35	3	3	3	3	8	5	22	13	1	1	2	2
258	5	7	22	15	1	1	2	2	5	7	6	10	1	1	1	2	34	34	40	36	3	3	3	3	7	5	22	14	1	1	2	2
259	5	8	23	15	1	1	2	2	5	7	5	10	1	1	1	2	32	34	39	34	3	3	3	3	5	5	26	14	1	1	2	2
260	5	7	24	16	1	1	2	2	5	6	5	10	1	1	1	2	31	33	38	35	3	3	3	3	5	4	26	17	1	1	2	2
261	5	7	25	16	1	1	2	2	6	6	5	10	1	1	1	2	33	32	39	35	3	3	3	3	5	4	24	17	1	1	2	2
262	5	6	25	16	1	1	2	2	6	6	3	9	1	1	1	1	35	32	38	35	3	3	3	3	6	4	25	17	1	1	2	2
263	5	6	23	16	1	1	2	2	7	6	3	9	1	1	1	1	35	32	38	34	3	3	3	3	6	4	25	18	1	1	2	2
264	7	6	24	16	1	1	2	2	8	6	3	9	1	1	1	1	35	32	36	33	3	3	3	3	7	4	25	18	1	1	2	2
265	6	6	25	15	1	1	2	2	7	6	3	9	1	1	1	1	32	31	36	33	3	3	3	3	6	4	26	17	1	1	2	2
266	7	5	25	15	1	1	2	2	7	5	3	9	1	1	1	1	32	30	37	34	3	3	3	3	6	3	26	18	1	1	2	2
267	8	6	26	15	1	1	2	2	7	5	3	10	1	1	1	2	32	29	37	34	3	2	3	3	6	2	25	17	1	1	2	2
268	8	6	29	16	1	1	2	2	7	5	2	10	1	1	1	2	33	28	37	35	3	2	3	3	6	2	26	18	1	1	2	2
269	9	5	28	17	1	1	2	2	8	4	2	10	1	1	1	2	33	25	37	35	3	2	3	3	8	2	27	17	1	1	2	2
270	9	6	28	17	1	1	2	2	8	5	2	10	1	1	1	2	32	25	37	35	3	2	3	3	8	2	29	17	1	1	2	2
271	9	6	28	17	1	1	2	2	8	5	2	10	1	1	1	2	32	25	37	35	3	2	3	3	8	2	29	17	1	1	2	2
272	9	6	31	17	1	1	3	2	10	5	2	11	2	1	1	2	32	24	37	35	3	2	3	3	9	2	31	17	1	1	3	2
273	9	6	32	19	1	1	3	2	11	5	2	11	2	1	1	2	33	24	36	36	3	2	3	3	9	2	31	17	1	1	3	2
274	9	6	34	20	1	1	3	2	11	5	4	11	2	1	1	2	34	25	34	36	3	2	3	3	10	2	31	17	2	1	3	2
275	10	6	35	20	2	1	3	2	12	5	4	11	2	1	1	2	34	25	34	39	3	2	3	3	10	3	33	17	2	1	3	2
276	11	6	34	21	2	1	3	2	12	5	5	12	2	1	1	2	34	25	34	41	3	2	3	3	10	3	33	20	2	1	3	2
277	11	6	35	23	2	1	3	2	12	5	5	12	2	1	1	2	35	25	34	41	3	2	3	3	10	3	33	20	2	1	3	2
278	10	6	35	24	2	1	3	2	12	5	6	12	2	1	1	2	35	23	35	41	3	2	3	3	10	2	33	21	2	1	3	2
279	11	5	34	24	2	1	3	2	12	4	6	12	2	1	1	2	33	24	35	42	3	2	3	3	10	2	33	22	2	1	3	2
280	12	5	34	24	2	1	3	2	12	4	6	12	2	1	1	2	33	24	34	40	3	2	3	3	11	2	34	22	2	1	3	2
281	11	5	33	25	2	1	3	2	11	4	6	12	2	1	1	2	34	24	33	39	3	2	3	3	11	2	33	23	2	1	3	2
282	12	5	36	25	2	1	3	2	12	4	7	12	2	1	1	2	34	24	34	38	3	2	3	3	12	2	34	23	2	1	3	2
283	14	5	35	24	2	1	3	2	12	4	8	11	2	1	1	2	32	24	35	38	3	2	3	3	12	2	35	25	2	1	3	2
284	15	6	36	23	2	1	3	2	12	4	9	11	2	1	1	2	34	24	35	38	3	2	3	3	13	2	36	24	2	1	3	2
285	15	6	37	25	2	1	3	2	13	3	9	11	2	1	1	2	33	23	36	36	3	2	3	3	14	2	38	25	2	1	3	2
286	15	6	35	26	2	1	3	2	13	3	10	11	2	1	2	2	35	22	35	35	3	2	3	3	14	2	37	25	2	1	3	2
287	15	7	36	25	2	1	3	2	14	3	12	10	2	1	2	2	35	22	34	35	3	2	3	3	14	2	37	26	2	1	3	2
288	17	7	38	25	2	1	3	2	13	4	14	10	2	1	2	2	36	22	36	35	3	2	3	3	15	2	37	27	2	1	3	2
289	18	8	35	25	2	1	3	2	13	4	16	10	2	1	2	2	36	21	36	34	3	2	3	3	16	1	37	28	2	1	3	2
290	18	9	36	24	2	1	3	2	13	4	16	9	2	1	2	1	36	21	36	33	3	2	3	3	17	1	36	28	2	1	3	2
291	18	10	37	27	2	2	3	2	14	5	17	9	2	1	2	1	33	21	35	31	3	2	3	3	17	2	36	28	2	1	3	2
292	18	10	37	26	2	2	3	2	13	5	17	9	2	1	2	1	32	21	37	29	3	2	3	2	19	2	37	29	2	1	3	2
293	18	13	37	27	2	2	3	2	13	5	18	7	2	1	2	1	32	20	36	29	3	2	3	2	19	2	37	30	2	1	3	3
294	18	13	36	27	2	2	3	2	13	5	19	7	2	1	2	1	33	20	34	29	3	2	3	2	19	2	37	30	2	1	3	3
295	19	13	37	27	2	2	3	2	12	5	19	5	2	1	2	1	33	19	33	30	3	2	3	3	20	3	37	29	2	1	3	2
296	20	15	37	26	2	2	3	2	11	5	19	6	2	1	2	1	33	19	33	27	3	2	3	2	20	3	37	30	2	1	3	3
297	20	15	40	26	2	2	3	2	9	6	21	6	1	1	2	1	31	19	33	27	3	2	3	2	20	3	36	31	2	1	3	3
298	21	16	42	28	2	2	3	2	9	6	22	5	1	1	2	1	31	19	32	26	3	2	3	2	20	3	36	32	2	1	3	3
299	21	16	43	28	2	2	3	2	9	6	23	5	1	1	2	1	31	20	32	25	3	2	3	2	21	3	36	31	2	1	3	3
300	21	16	43	31	2	2	3	3	8	6	23	6	1	1	2	1	29	20	32	24	2	2	3	2	21	4	35	31	2	1	3	3
301	22	16	44	30	2	2	3	3	8	6	23	6	1	1	2	1	28	21	32	24	2	2	3	2	21	6	35	32	2	1	3	3
302	21	17	43	30	2	2	3	3	7	6	24	7	1	1	2	1	28	20	31	24	2	2	3	2	21	7	35	31	2	1	3	3
303	22	18	45	31	2	2	3	3	6	5	25	7	1	1	2	1	28	21	30	24	2	2	3	2	21	7	35	31	2	1	3	3
304	23	18	44	31	2	2	3	3	4	6	28	7	1	1	2	1	29	21	30	24	2	2	3	2	22	8	35	31	2	1	3	3
305	23	18	46	31	2	2	3	3	3	6	28	9	1	1	2	1	28	21	30	23	2	2	3	2	22	9	35	30	2	1	3	3
306	24	18	47	33	2	2	3	3	2	6	29	9	1	1	2	1	28	20	30	24	2	2	3	2	23	9	35	33	2	1	3	3
307	25	19	49	34	2	2	3	3	2	6	31	11	1	1	3	2	26	20	30	26	2	2	3	2	22	9	35	35	2	1	3	3
308	26	19	48	34	2	2	3	3	4	8	31	12	1	1	3	2	24	20	30	27	2	2	3	2	23	10	35	35	2	2	3	3
309	26	20	47	38	2	2	3	3	5	8	31	11	1	1	3	2	24	21	30	26	2	2	3	2	23	10	35	34	2	2	3	3
310	26	20	48	38	2	2	3	3	5	9	31	13	1	1	3	2	24	21	29	26	2	2	2	2	23	10	34	34	2	2	3	3
311	29	20	48	40	2	2	3	3	5	9	30	13	1	1	3	2	24	22	28	28	2	2	2	2	23	11	34	36	2	2	3	3
312	29	21	45	42	2	2	3	3	5	9	29	14	1	1	2	2	25	23	28	29	2	2	2	2	25	12	33	37	2	2	3	3
313	29	22	45	42	2	2	3	3	5	9	29	16	1	1	2	2	26	23	28	29	2	2	2	2	26	12	33	37	2	2	3	3
314	30	20	44	43	3	2	3	3	5	9	30	17	1	1	3	2	27	23	28	28	2	2	2	2	27	12	33	38	2	2	3	3
315	30	21	44	43	3	2	3	3	5	13	29	17	1	2	2	2	27	22	29	28	2	2	2	2	27	12	34	38	2	2	3	3
316	31	21	42	42	3	2	3	3	5	13	28	18	1	2	2	2	28	22	28	31	2	2	2	3	29	12	32	37	2	2	3	3
317	32	22	41	43	3	2	3	3	6	14	28	19	1	2	2	2	27	22	29	32	2	2	2	3	30	10	32	38	3	2	3	3
318	33	23	42	43	3	2	3	3	6	14	28	18	1	2	2	2	27	22	29	32	2	2	2	3	30	10	30	39	3	2	3	3
319	33	24	41	45	3	2	3	3	7	14	27	20	1	2	2	2	27	22	28	34	2	2	2	3	29	11	30	40	2	2	3	3
320	34	24	40	44	3	2	3	3	8	14	28	20	1	2	2	2	28	22	26	36	2	2	2	3	30	12	26	42	3	2	2	3
321	34	24	38	44	3	2	3	3	8	15	27	21	1	2	2	2	28	22	26	37	2	2	2	3	31	12	26	43	3	2	2	3
322	34	26	36	44	3	2	3	3	9	15	25	22	1	2	2	2	28	21	24	37	2	2	2	3	31	12	25	43	3	2	2	3
323	34	25	33	43	3	2	3	3	10	15	24	22	2	2	2	2	29	21	25	35	2	2	2	3	31	12	25	42	3	2	2	3
324	34	25	34	43	3	2	3	3	10	16	25	23	2	2	2	2	30	19	25	35	3	2	2	3	32	12	25	41	3	2	2	3
325	34	25	34	45	3	2	3	3	11	16	25	24	2	2	2	2	33	20	27	34	3	2	2	3	35	12	27	41	3	2	2	3
326	34	26	36	44	3	2	3	3	12	16	25	25	2	2	2	2	33	20	28	34	3	2	2	3	35	12	28	41	3	2	2	3
327	33	25	34	46	3	2	3	3	12	16	26	25	2	2	2	2	34	20	28	34	3	2	2	3	36	12	27	41	3	2	2	3
328	33	26	34	47	3	2	3	3	12	17	25	27	2	2	2	2	33	18	28	37	3	2	2	3	35	13	26	44	3	2	2	3
329	33	27	32	48	3	2	3	3	12	17	26	28	2	2	2	2	34	16	28	37	3	2	2	3	35	12	26	44	3	2	2	3
330	33	27	32	48	3	2	3	3	13	18	26	28	2	2	2	2	33	16	30	36	3	2	3	3	36	11	28	42	3	2	2	3
331	33	27	32	50	3	2	3	3	14	18	26	29	2	2	2	2	34	16	31	33	3	2	3	3	37	11	29	41	3	2	2	3
332	35	25	31	49	3	2	3	3	15	19	26	32	2	2	2	3	33	16	32	33	3	2	3	3	36	12	28	41	3	2	2	3
333	37	27	31	48	3	2	3	3	17	17	27	34	2	2	2	3	30	15	32	33	3	2	3	3	35	12	28	40	3	2	2	3
334	40	27	31	50	3	2	3	3	19	18	27	34	2	2	2	3	30	16	35	34	3	2	3	3	34	13	29	40	3	2	2	3
335	41	28	29	49	3	2	2	3	21	18	26	36	2	2	2	3	31	16	33	34	3	2	3	3	33	13	29	40	3	2	2	3
336	42	27	29	52	3	2	2	3	24	19	26	36	2	2	2	3	30	18	35	34	3	2	3	3	33	14	31	39	3	2	3	3
337	43	27	28	53	3	2	2	3	24	19	26	37	2	2	2	3	30	19	34	35	3	2	3	3	33	14	30	40	3	2	3	3
338	44	27	28	53	3	2	2	3	24	19	26	37	2	2	2	3	29	18	34	35	2	2	3	3	32	14	30	40	3	2	3	3
339	45	27	28	52	3	2	2	3	24	19	25	37	2	2	2	3	28	19	33	34	2	2	3	3	31	14	30	40	3	2	3	3
340	45	27	28	50	3	2	2	3	26	18	25	38	2	2	2	3	27	19	34	35	2	2	3	3	30	13	31	40	3	2	3	3
341	44	29	28	49	3	2	2	3	28	18	25	38	2	2	2	3	26	19	33	34	2	2	3	3	29	12	32	40	2	2	3	3
342	45	28	28	48	3	2	2	3	29	19	25	37	2	2	2	3	26	20	33	33	2	2	3	3	29	13	32	41	2	2	3	3
343	45	29	28	49	3	2	2	3	29	19	24	37	2	2	2	3	26	20	32	32	2	2	3	3	29	12	30	40	2	2	3	3
344	47	30	28	46	3	3	2	3	30	19	24	34	3	2	2	3	27	20	33	34	2	2	3	3	32	12	31	39	3	2	3	3
345	47	29	29	45	3	2	2	3	30	19	25	34	3	2	2	3	26	21	33	33	2	2	3	3	31	13	29	38	3	2	2	3
346	46	30	29	43	3	3	2	3	31	20	25	35	3	2	2	3	27	22	34	33	2	2	3	3	32	13	30	39	3	2	3	3
347	45	30	28	42	3	3	2	3	31	20	24	34	3	2	2	3	27	22	34	33	2	2	3	3	31	13	30	38	3	2	3	3
348	44	29	27	42	3	2	2	3	31	19	24	34	3	2	2	3	28	24	36	33	2	2	3	3	30	15	32	37	3	2	3	3
349	44	28	27	41	3	2	2	3	32	19	24	32	3	2	2	3	28	25	35	34	2	2	3	3	29	16	32	34	2	2	3	3
350	44	27	25	39	3	2	2	3	34	18	24	33	3	2	2	3	28	26	34	34	2	2	3	3	27	16	32	35	2	2	3	3
351	47	27	25	37	3	2	2	3	35	18	25	32	3	2	2	3	28	26	37	32	2	2	3	3	27	17	35	32	2	2	3	3
352	47	27	25	36	3	2	2	3	36	18	25	30	3	2	2	3	27	27	37	32	2	2	3	3	27	20	34	31	2	2	3	3
353	46	26	26	37	3	2	2	3	36	18	25	31	3	2	2	3	27	27	37	31	2	2	3	3	27	20	34	30	2	2	3	3
354	46	26	25	36	3	2	2	3	38	18	27	29	3	2	2	2	27	28	36	29	2	2	3	2	26	20	33	29	2	2	3	2
355	46	26	27	33	3	2	2	3	38	18	27	27	3	2	2	2	28	27	35	29	2	2	3	2	27	18	33	28	2	2	3	2
356	45	25	27	32	3	2	2	3	36	18	28	28	3	2	2	2	28	27	36	31	2	2	3	3	25	18	34	28	2	2	3	2
357	43	26	27	30	3	2	2	3	36	18	27	27	3	2	2	2	28	26	36	31	2	2	3	3	25	18	34	28	2	2	3	2
358	43	26	27	27	3	2	2	2	36	18	27	27	3	2	2	2	28	27	35	31	2	2	3	3	24	19	33	28	2	2	3	2
359	42	24	27	26	3	2	2	2	36	18	27	25	3	2	2	2	26	27	34	30	2	2	3	3	23	19	32	26	2	2	3	2
360	42	24	27	26	3	2	2	2	37	17	26	24	3	2	2	2	27	27	32	30	2	2	3	3	23	20	31	27	2	2	3	2
	28.6556	23.1472	29.2167	31.0611					24.975	20.8472	24.2778	26.8167					32.1444	29.0222	33.2778	35.1444					28.2361	20.9917	30.0194	32.8083
	28.0201								24.2292								32.3972								28.0139
		28.1651
